# Supplementary material for: Rumen Epithelial Communities Share a Core Bacterial Microbiota: A Meta-Analysis of 16S rRNA Gene Illumina MiSeq Sequencing Datasets
Source: Front Microbiol. 2021 Mar 15;12:625400. doi: 10.3389/fmicb.2021.625400 (PMC8005654; doi:10.3389/fmicb.2021.625400)
Supplement: Supplementary file 4 [file Table_4.XLSX]

## Sheet: Top 50 de novo OTUs
Supplementary Table 4: The 50 most abundant OTUs based on de novo OTU clustering
OTU	Relative Abundance (%)	Phylum	Taxonomy (Silva v132)	NCBI BLAST classification, percent similarity, and accession number	Rumen Genome Collection classification and percent similarity
OTU 01	10.3413	Bacteroidetes	Prevotellaceae_unclassified	No sequence with >90% identity	Prevotellaceae bacterium, 97.63%
OTU 02	6.17974	Firmicutes	Lachnospiraceae_unclassified	No sequence with >90% identity	No sequence with >90% identity
OTU 03	6.0036	Epsilonbacteraeota	Campylobacter	Campylobacter gracilis strain ATCC 33236, 97.58%, NR_118516.1	No sequence with >90% identity
OTU 04	2.60643	Firmicutes	Ruminococcaceae_NK4A214_group	Intestinimonas butyriciproducens strain SRB-521-5-I, 93.25%, NR_118554.1	Oscillibacter sp. 90.51%
OTU 05	1.9969	Proteobacteria	Comamonas	Brachymonas denitrificans strain AS-P1, 95.29%, NR_025834.1	No sequence with >90% identity
OTU 06	1.91523	Proteobacteria	Succinivibrionaceae_UCG-001	No sequence with >90% identity	Ruminobacter sp. 97.99%
OTU 07	1.88713	Firmicutes	Succiniclasticum	Succiniclasticum ruminis strain SE10, 95.25%, NR_026205.1	Succiniclasticum ruminis, 95.30%
OTU 08	1.85389	Proteobacteria	Desulfobulbus	Desulfobulbus oligotrophicus strain Prop6, 95.61%, NR_156089.1	No sequence with >90% identity
OTU 09	1.42196	Firmicutes	Christensenellaceae_R-7_group	No sequence with >90% identity	Sarcina sp. 94.28%
OTU 10	1.19351	Proteobacteria	Neisseriaceae	Snodgrassella alvi wkB2, 93.97%, NR_118404.2	No sequence with >90% identity
OTU 11	1.03167	Proteobacteria	Neisseriaceae	Alysiella crassa strain NBRC 102455, 93.53%, NR_114099.1	No sequence with >90% identity
OTU 12	0.886345	Firmicutes	Butyrivibrio_2	Butyrivibrio proteoclasticus strain B316, 91.96% NR_102893.1	Butyrivibrio sp. 93.78%
OTU 13	0.851316	Proteobacteria	Suttonella	Suttonella ornithocola strain B6/99/2, 91.83%, NR_042279.1	No sequence with >90% identity
OTU 14	0.832924	Bacteroidetes	Prevotellaceae_UCG-001	No sequence with >90% identity	No sequence with >90% identity
OTU 15	0.829971	Firmicutes	Christensenellaceae_unclassified	Clostridium oceanicum strain DSM 1290, 90.26%, NR_117133.2	Clostridiales bacterium, 95.57%
OTU 16	0.766871	Firmicutes	Mogibacterium	Mogibacterium neglectum strain P9a-h, 92.84%, NR_027203.1	Peptostreptococcaceae bacterium, 90.32%
OTU 17	0.740146	Bacteroidetes	Prevotella_1	Prevotella ruminicola strain Bryant 23, 99.21%, NR_102887.1	Prevotella ruminicola, 99.21%
OTU 18	0.653421	Proteobacteria	Succinivibrionaceae_UCG-002	No sequence with >90% identity	No sequence with >90% identity
OTU 19	0.651579	Proteobacteria	Desulfobulbus	Desulfobulbus rhabdoformis strain M16, 95.14%, NR_029176.1	No sequence with >90% identity
OTU 20	0.639269	Firmicutes	Butyrivibrio_2	Butyrivibrio proteoclasticus strain B316, 92.80%, NR_102893.1	Butyrivibrio sp. 93.17%
OTU 21	0.633304	Firmicutes	Clostridiales_unclassified	No sequence with >90% identity	No sequence with >90% identity
OTU 22	0.621754	Firmicutes	Succiniclasticum	Succiniclasticum ruminis strain SE10, 94.69%, NR_026205.1	Succiniclasticum ruminis, 94.58%
OTU 23	0.613918	Firmicutes	Lachnospiraceae_UCG-008	Stomatobaculum longum strain ACC2, 90.19%, NR_117792.1	No sequence with >90% identity
OTU 24	0.594825	Bacteroidetes	Blvii28_wastewater-sludge_group	No sequence with >90% identity	No sequence with >90% identity
OTU 25	0.54845	Euryarchaeota	Methanobrevibacter	Methanobrevibacter thaueri strain CW, 99.25%, NR_044787.1	Methanobrevibacter sp. 99.62%
OTU 26	0.587456	Firmicutes	Howardella	Howardella ureilytica strain GPC 589, 93.77%, NR_044022.2	Lachnospira pectinoschiza, 91.49%
OTU 27	0.582982	Proteobacteria	Desulfobulbus	Desulfobulbus oligotrophicus strain Prop6, 94.89%, NR_156089.1	No sequence with >90% identity
OTU 28	0.559591	Bacteria_unclassified	Bacteria_unclassified	No sequence with >90% identity	No sequence with >90% identity
OTU 29	0.525175	Proteobacteria	Rhodocyclaceae_unclassified	Azoarcus olearius strain DQS-4, 93.66%, NR_108183.1	No sequence with >90% identity
OTU 30	0.50307	Proteobacteria	Desulfovibrio	Desulfovibrio intestinalis strain KMS2, 96.36%, NR_026413.1	Desulfovibrio desulfuricans, 95.81%
OTU 31	0.49883	Firmicutes	Ruminococcus_1	Ruminococcus flavefaciens strain C94, 97.73%, NR_025931.1	Ruminococcus flavefaciens, 98.86%
OTU 32	0.494708	Synergistetes	Fretibacterium	Fretibacterium fastidiosum strain SGP1, 95.45%, NR_108538.1	No sequence with >90% identity
OTU 33	0.439532	Bacteroidetes	F082_ge (Bacteroidales)	No sequence with >90% identity	No sequence with >90% identity
OTU 34	0.425117	Firmicutes	Acetitomaculum	Hespellia porcina strain PC80, 92.25%, NR_025206.1	Acetitomaculum ruminis, 91.29%
OTU 35	0.392515	Spirochaetes	Treponema_2	No sequence with >90% identity	No sequence with >90% identity
OTU 36	0.390965	Firmicutes	Saccharofermentans	Saccharofermentans acetigenes strain P6, 93.14%, NR_115340.1	Butyrivibrio sp. 99.06%
OTU 37	0.335526	Firmicutes	Family_XIII_ge (Clostridiales)	Eubacterium pyruvativorans strain I-6, 92.57%, NR_042074.1	Eubacterium pyruvativorans, 92.57%
OTU 38	0.333304	Firmicutes	Ruminococcaceae_NK4A214_group	Sporobacter termitidis strain SYR, 92.64%, NR_044972.1	Ruminococcaceae bacterium, 94.03%
OTU 39	0.331053	Firmicutes	Lachnospiraceae_UCG-010	Anaerotignum propionicum strain JCM 1430, 93.93%, NR_113408.1	No sequence with >90% identity
OTU 40	0.326754	Firmicutes	Butyrivibrio_2	Butyrivibrio proteoclasticus strain B316, 92.44%, NR_102893.1	Butyrivibrio sp. 93.36%
OTU 41	0.320409	Proteobacteria	JGI_0000069-P22_ge	No sequence with >90% identity	No sequence with >90% identity
OTU 42	0.313743	Bacteroidetes	Rikenellaceae_RC9_gut_group	No sequence with >90% identity	Bacteroidia bacterium, 93.24%
OTU 43	0.311959	Proteobacteria	Ruminobacter	Ruminobacter amylophilus strain H 18, 95.67%, NR_026450.1	Ruminobacter amylophilus, 95.84%
OTU 44	0.308538	Bacteroidetes	Prevotellaceae_unclassified	No sequence with >90% identity	No sequence with >90% identity
OTU 45	0.307719	Euryarchaeota	Methanomethylophilaceae	No sequence with >90% identity	Methanomicrobiales archaeon, 91.63%
OTU 46	0.304854	Bacteroidetes	Prevotellaceae_UCG-001	No sequence with >90% identity	Prevotella sp. 91.41%
OTU 47	0.288158	Firmicutes	Ruminococcaceae_UCG-014	No sequence with >90% identity	No sequence with >90% identity
OTU 48	0.282573	Firmicutes	Ruminococcus_2	Ruminococcus bromii strain ATCC 27255, 96%, NR_025930.1	Ruminococcaceae bacterium P7, 98.9%
OTU 49	0.274883	Firmicutes	Family_XIII_ge (Clostridiales)	Emergencia timonensis strain SN18, 93.09%, NR_144737.1	Lachnospiraceae bacterium, 93.0%
OTU 50	0.274357	Fibrobacteres	Fibrobacter	Fibrobacter succinogenes subsp succinogenes strain S85, 99.21%, NR_074123.1	Fibrobacter succinogenes, 95.65%
