# Supplementary material for: Rumen Epithelial Communities Share a Core Bacterial Microbiota: A Meta-Analysis of 16S rRNA Gene Illumina MiSeq Sequencing Datasets
Source: PubMed Central journal article supplement (PMC8005654; doi:10.3389/fmicb.2021.625400), 2021-03-15
Supplement: Table_5.pdf [file Table_5.pdf]

**Supplementary Table 5: PERMANOVA and PERMDISP2 comparing microbial communities by study and animal using Bray-Curtis distances**

| Clustering Method | Variable | Test      | P-value |
|-------------------|----------|-----------|---------|
| De novo           | Study    | PERMANOVA | 0.001   |
| De novo           | Study    | PERMDISP2 | 0.001   |
| De novo           | Animal   | PERMANOVA | 0.001   |
| De novo           | Animal   | PERMDISP2 | 0.001   |
| Closed-reference  | Study    | PERMANOVA | 0.001   |
| Closed-reference  | Study    | PERMDISP2 | 0.001   |
| Closed-reference  | Animal   | PERMANOVA | 0.001   |
| Closed-reference  | Animal   | PERMDISP2 | 0.001   |

All tests were conducted in R based on Bray-Curtis distances using the “adonis” and “betadisper” commands of the R package vegan v2.5.6. PERMANOVA results indicate significant differences between the centroids of the communities in all 4 cases. PERMDISP2 tests the hypothesis of equal variance and found that variance is not equal between groups, as expected in this highly uneven dataset. As such it is unclear whether the differences between centroids reflect true differences or are caused by differences in variance, but these differences are represented in Figures 2 and 4 (PCoA of closed-reference and de novo OTU clustered communities respectively).
